# Supplementary material for: FRI-1 Is an Anti-Cancer Isoquinolinequinone That Inhibits the Mitochondrial Bioenergetics and Blocks Metabolic Shifts by Redox Disruption in Breast Cancer Cells
Source: MDPI journal article supplement (doi:10.3390/antiox10101618), 2021-10-14
Supplement: s1 [file s1]

**FRI-1 is an anti-cancer isoquinolinequinone that inhibits the mitochondrial bioenergetics and blocks metabolic shifts by redox disruption in breast cancer cells.**

Miguel Córdova-Delgado, Sebastián Fuentes-Retamal, Charlotte Palominos, Camila López-Torres, Daniela Guzmán-Rivera, Oney Ramírez-Rodríguez, Ramiro Araya-Maturana and Félix A. Urra.

Supplementary information

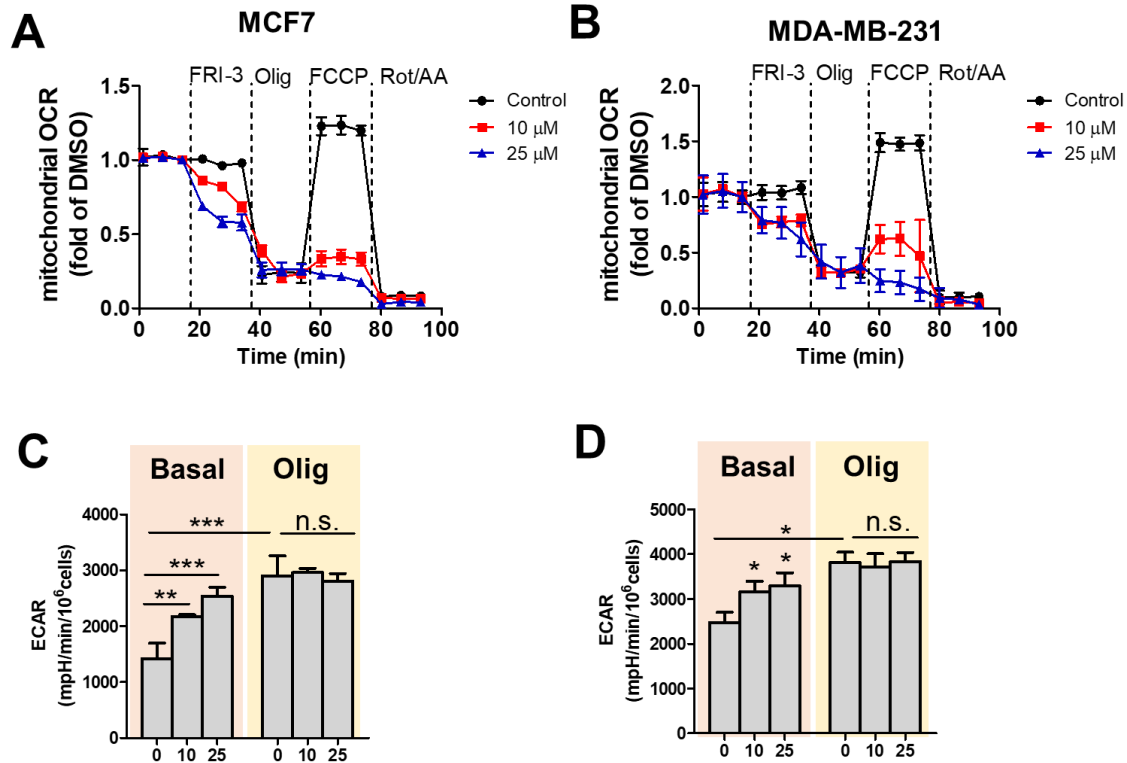

**Supplementary Figure S1.** FRI-3 inhibits the mitochondrial respiration, producing a metabolic remodeling toward glycolysis and lacks effects on oligomycin-induced glycolysis in BC cells. Data shown are the mean  $\pm$  SD of three independent experiments. \*  $p < 0.05$ , \*\*  $p < 0.01$ , \*\*\*  $p < 0.001$ , vs. control (DMSO). n.s.: not significant.

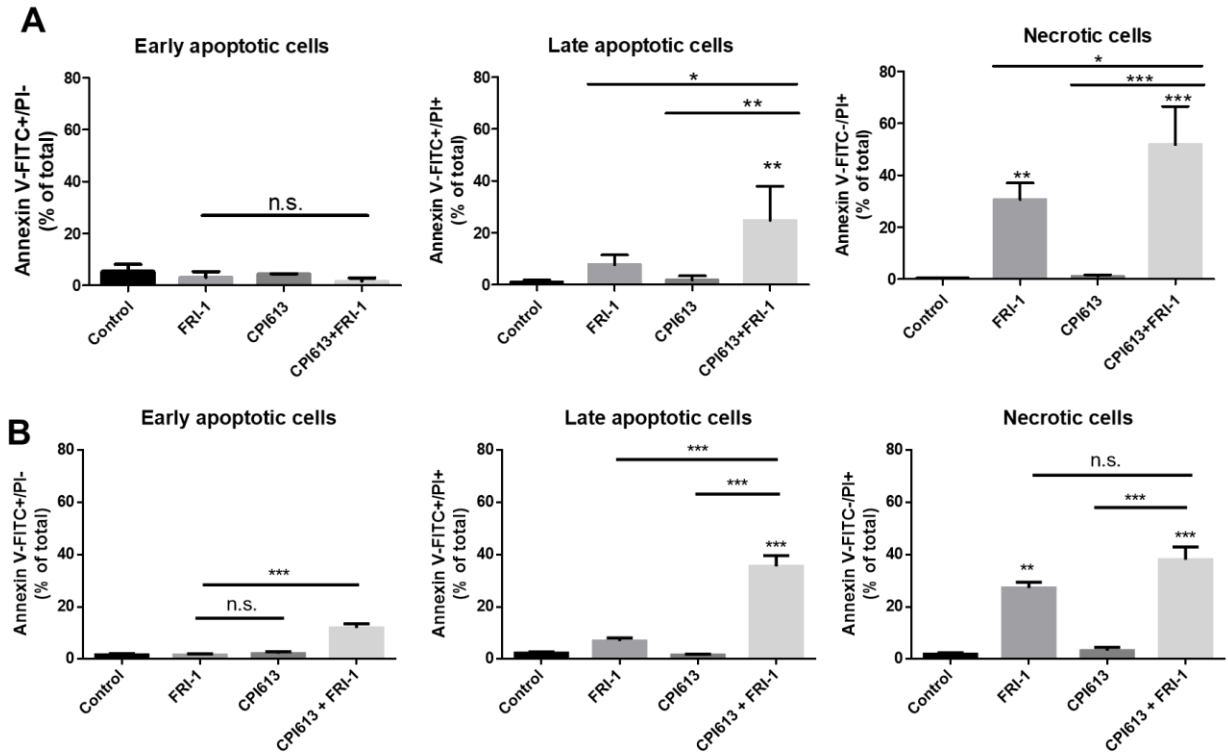

**Supplementary Figure S2.** Cell death stages produced by FRI-1 + CPI-613 combination in MCF7 (A) and MDA-MB-231 cells (B). Subpopulations for Annexin V-FITC and PI were evaluated at 48 h of treatment. Data shown are the mean  $\pm$  SD of three independent experiments. \*  $p < 0.05$ , \*\*  $p < 0.01$ , \*\*\*  $p < 0.001$ , vs. control (DMSO). n.s.: not significant.

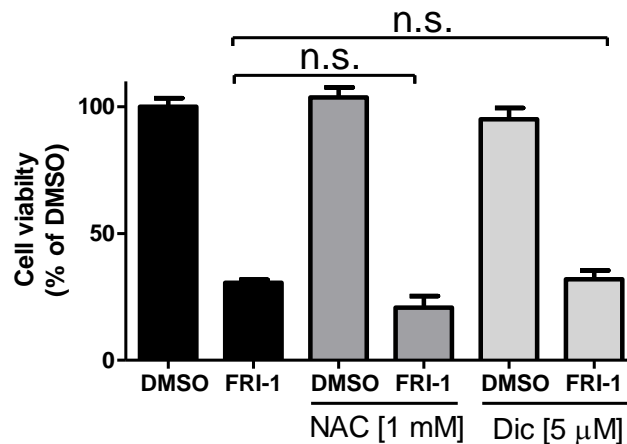

**Supplementary Figure S3.** Effect of antioxidant NAC and NQO1 inhibitor dicoumarol (Dic) on cell death induced by FRI-1 in MCF7 cells. Cells were incubated with NAC or Dic 1 h prior to the FRI-1 treatment (25  $\mu$ M) and the viability was analyzed at 24 h. Data shown are the mean  $\pm$  SD of three independent experiments. n.s.: not significant.

## Uncropped Western blots

### N1 – MCF7 cells

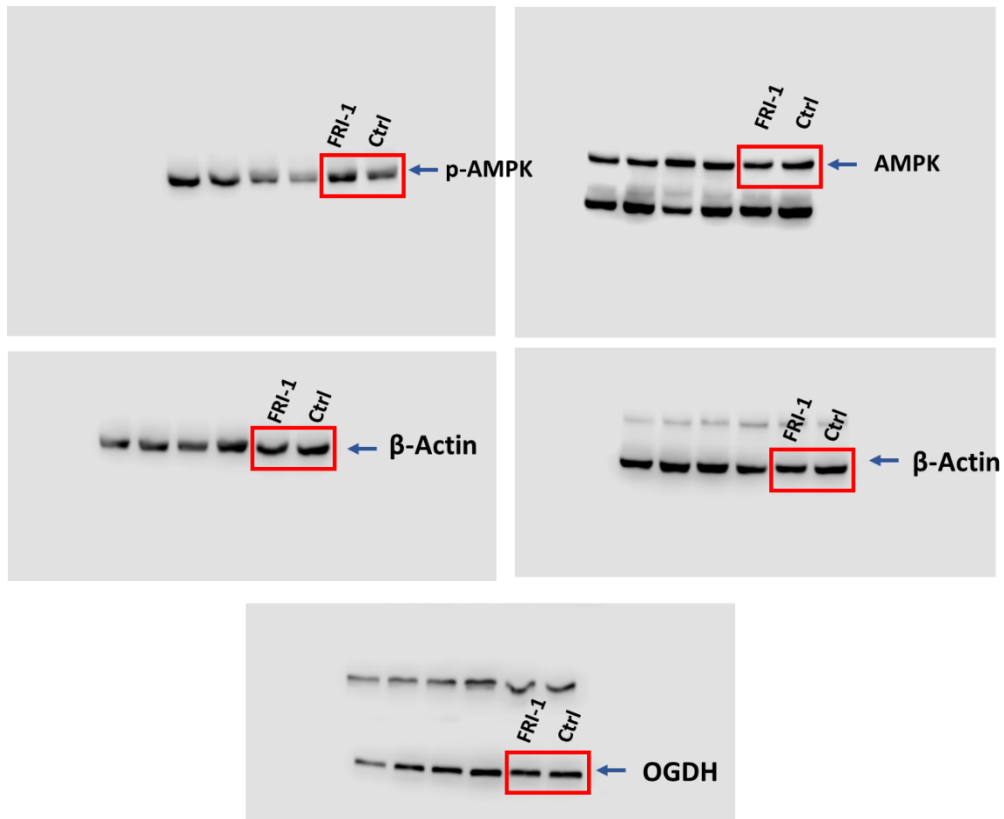

(Image used for representative Figure)

## N2- MCF7 cells

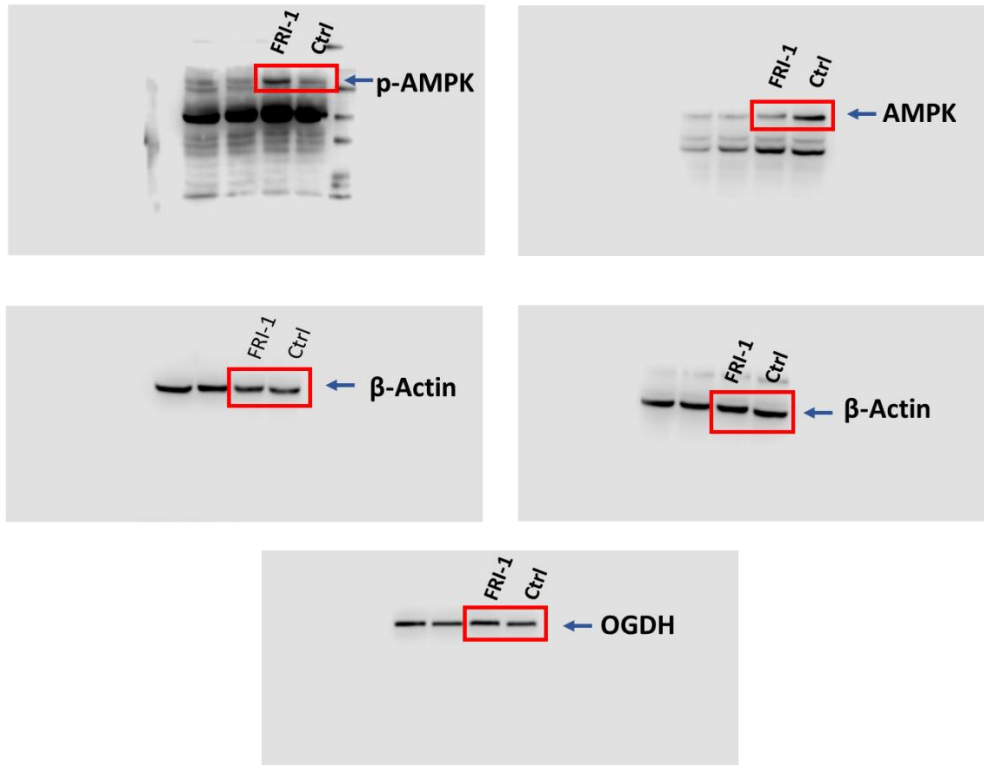

## N3 – MCF7

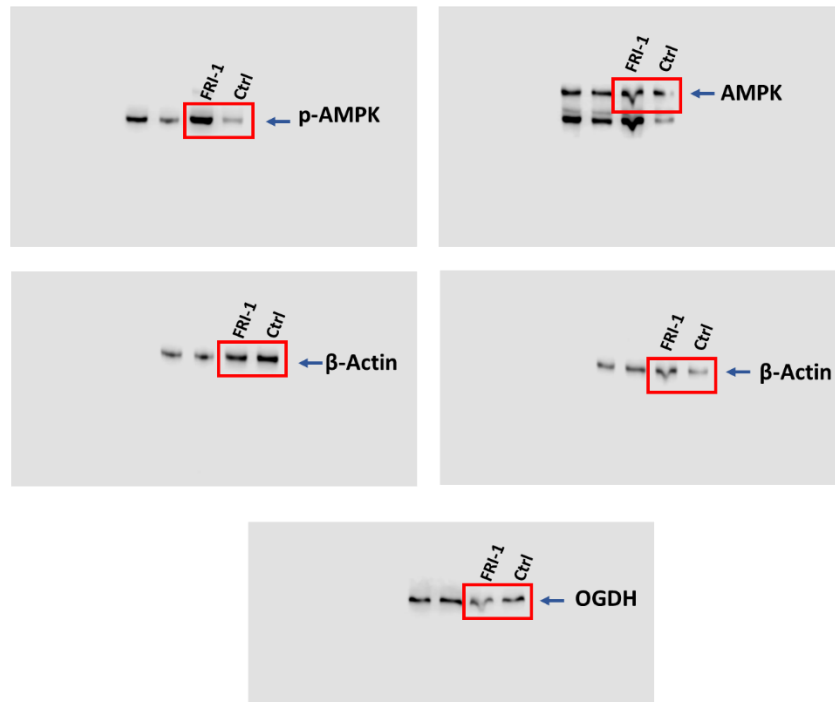

**N1 – MDA-MB-231 cells**

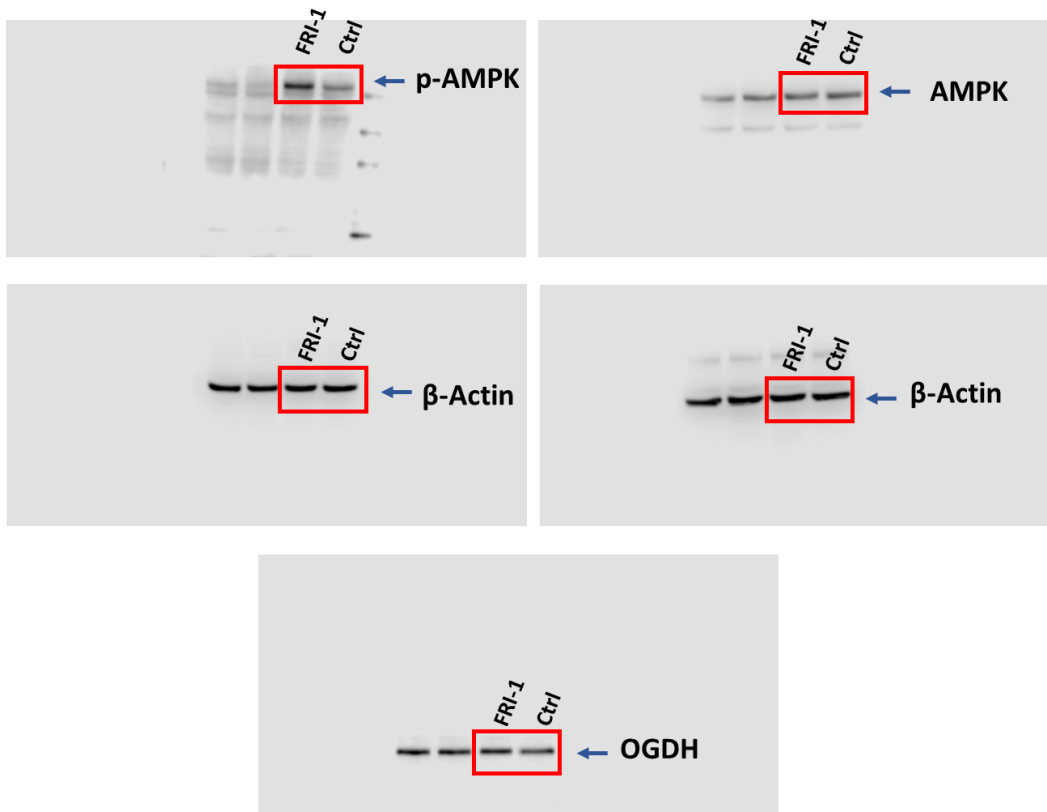

(Image used for representative Figure)

N2 and N3 – MDA-MB-231 cells

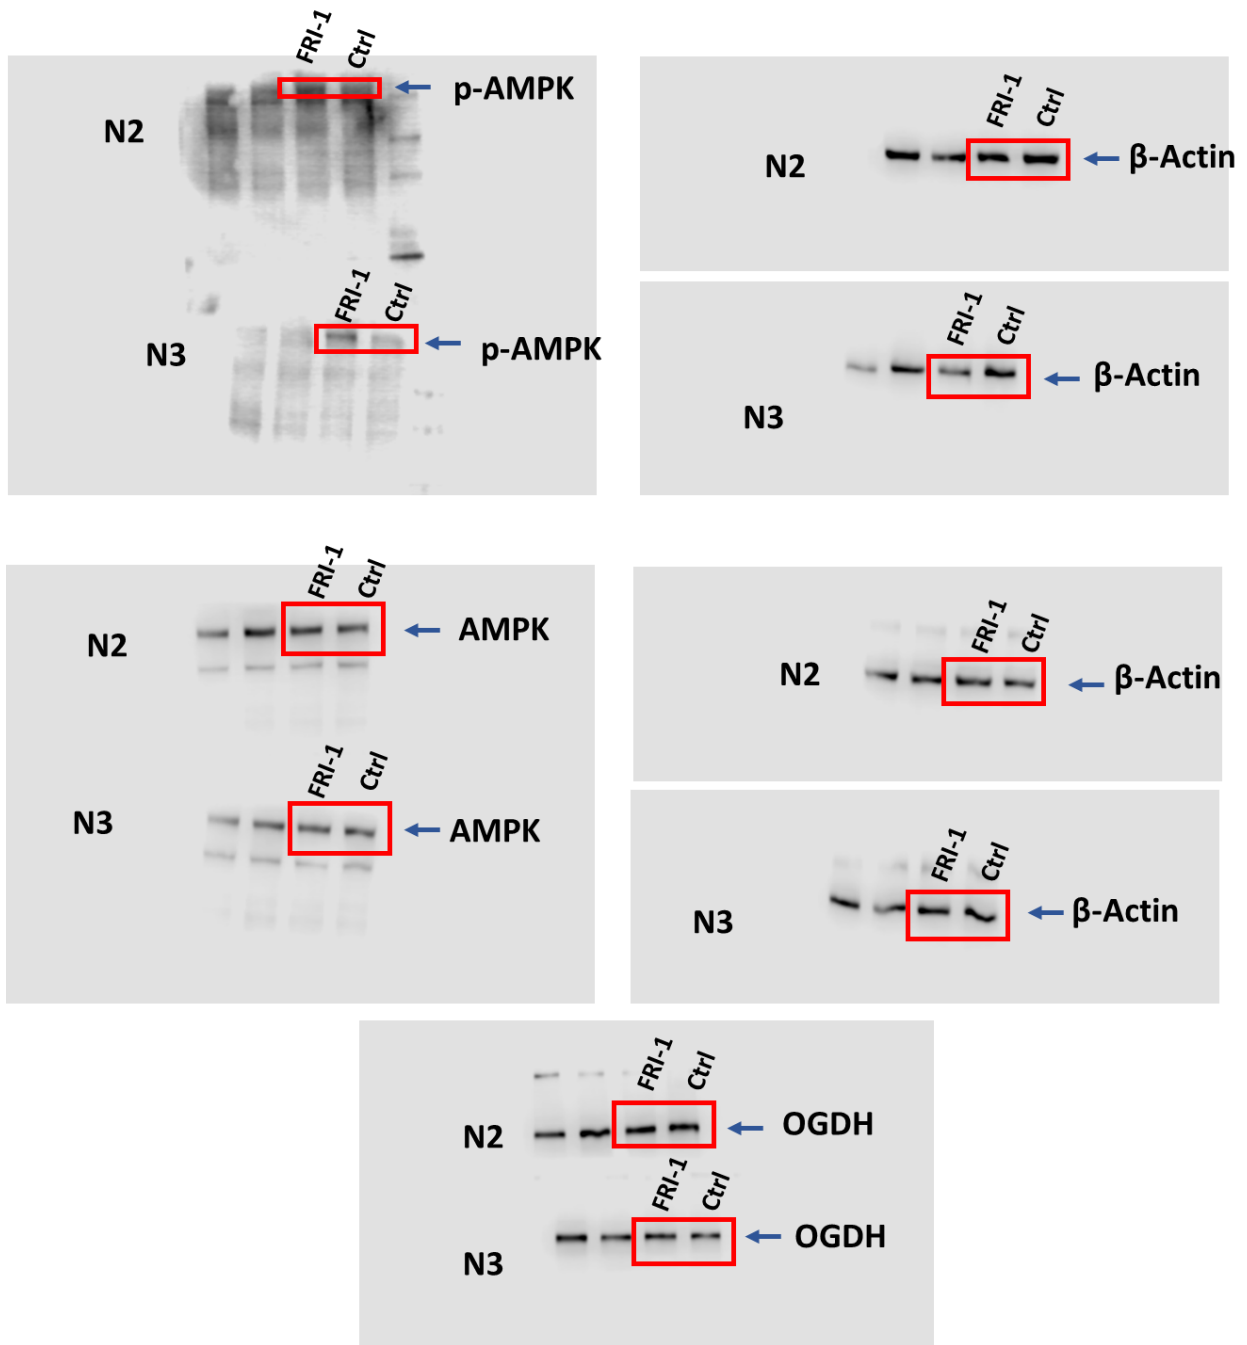

**Supplementary Figure S4.** Uncropped Western blots: Relative to Figure 4, MCF7 and MDA-MB-231 breast cancer cells.
